# Supplementary material for: Glycosylation Tunes Neuroserpin Physiological and Pathological Properties
Source: PubMed Central journal article supplement (PMC7247563; doi:10.3390/ijms21093235), 2020-05-03
Supplement: ijms-21-03235-s001.pdf [file ijms-21-03235-s001.pdf]

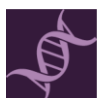

Supplementary material

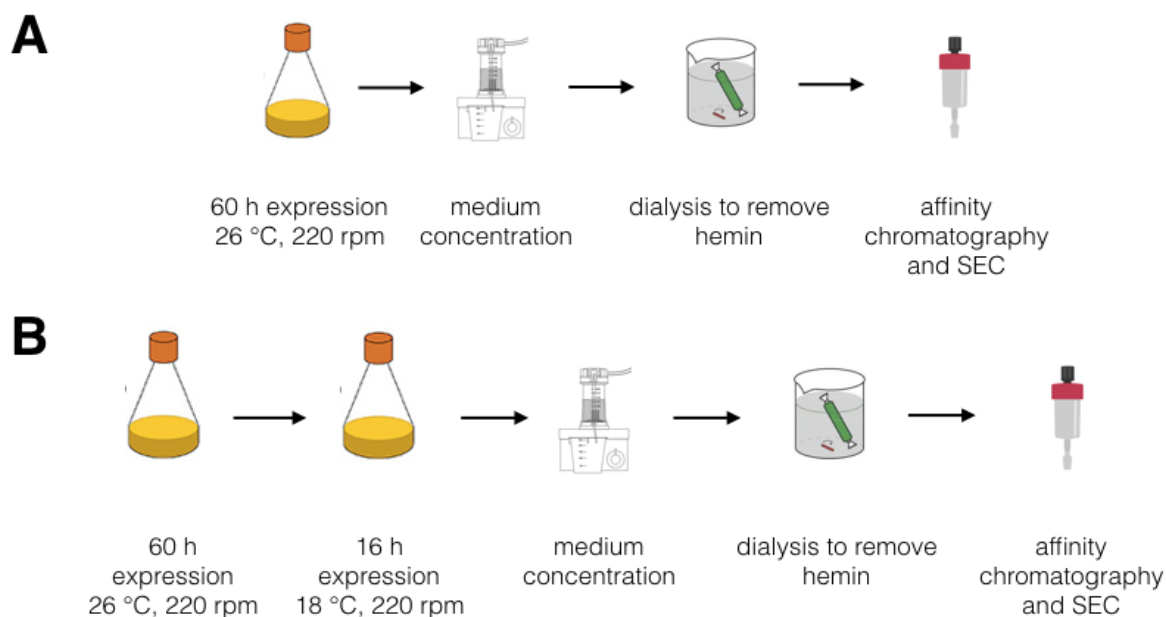

**Figure S1.** Schematic representation of expression and purification protocol of gNS using LEXSY. (A) Schematic representation of the initial protocol followed to express and purify gNS. (B) Schematic representation of the optimized protocol followed to express and purify gNS.

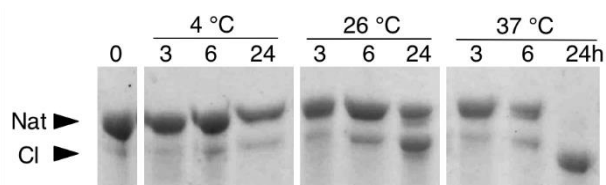

**Figure S2.** Monitoring NS spontaneous proteolysis at different temperature. Denaturing-PAGE analysis of 63.8  $\mu$ M NS in 10 mM Tris-HCl, 50 mM KCl, pH 8.0 incubated at 4, 26 or 37 °C at different incubation time.

**Table 1.** gNS peptides identified by UHPLC-MS/MS. Peptide position is numbered according to UniProt (entry Q99574); SP: signal peptide used in this work. L: peptide length. Mox: methionine oxidation; HexNAc: N-acetylhexoseamine; when present, numbers into brackets indicate the identified position of the post-translational modification (PTM) on the peptide. MC: number of missed-cleaved sites during trypsin digestion. CS: charge state of the identified peptide. m/z: mass-to-charge ratio of the identified peptide. RT: retention time (min).

| Position       | L         | Sequence                          | PTMs                   | MC       | CS        | m/z           | RT          |
|----------------|-----------|-----------------------------------|------------------------|----------|-----------|---------------|-------------|
| SP, 17-36      | 31        | GSHHHHHHTDPTGATFPPEEAIADLSVNMYNR  | 1 Mox [28]             | 0        | 5+        | 699,72        | 17,4        |
| 37-70          | 34        | LRATGEDENILFSPLSIALAMGMMEGAQGSTQK | -                      | 1        | 3+        | 1193,93       | 31,4        |
| 37-70          | 34        | LRATGEDENILFSPLSIALAMGMMEGAQGSTQK | 1 Mox                  | 1        | 3+        | 1199,26       | 32,0        |
| 37-70          | 34        | LRATGEDENILFSPLSIALAMGMMEGAQGSTQK | 2 Mox [23]             | 1        | 3+        | 1204,60       | 37,6        |
| 37-70          | 34        | LRATGEDENILFSPLSIALAMGMMEGAQGSTQK | 3 Mox [21, 23, 24]     | 1        | 4+        | 907,70        | 33,7        |
| 39-70          | 32        | ATGEDENILFSPLSIALAMGMMEGAQGSTQK   | -                      | 0        | 3+        | 1104,20       | 35,0        |
| 39-70          | 32        | ATGEDENILFSPLSIALAMGMMEGAQGSTQK   | 1 Mox                  | 0        | 3+        | 1109,53       | 35,9        |
| 39-70          | 32        | ATGEDENILFSPLSIALAMGMMEGAQGSTQK   | 2 Mox [21]             | 0        | 3+        | 1114,87       | 37,3        |
| 39-70          | 32        | ATGEDENILFSPLSIALAMGMMEGAQGSTQK   | 3 Mox [19, 21, 22]     | 0        | 3+        | 1120,20       | 36,5        |
| 74-82          | 9         | HSMGYDSLK                         | -                      | 0        | 2+        | 519,24        | 7,1         |
| 74-82          | 9         | HSMGYDSLK                         | 1 Mox [3]              | 0        | 2+        | 527,24        | 2,6         |
| 74-91          | 18        | HSMGYDSLKNGEETFSLK                | -                      | 1        | 3+        | 697,00        | 20,9        |
| 74-91          | 18        | HSMGYDSLKNGEETFSLK                | 1 Mox [3]              | 1        | 2+        | 1052,99       | 19,2        |
| 83-91          | 9         | NGEETFSLK                         | -                      | 0        | 2+        | 535,76        | 18,1        |
| 83-100         | 18        | NGEETFSLKFSNMVTAK                 | 1 Mox [14]             | 1        | 3+        | 698,67        | 27,1        |
| 92-107         | 16        | EFSNMVTAKESQYVMK                  | 2 Mox [5, 15]          | 1        | 3+        | 641,97        | 12,1        |
| 108-129        | 22        | IANSLFVQNGFHVNEEFQMMK             | 1 Mox                  | 0        | 3+        | 871,42        | 27,6        |
| 108-129        | 22        | IANSLFVQNGFHVNEEFQMMK             | 2 Mox [20, 21]         | 0        | 3+        | 876,76        | 26,0        |
| 108-130        | 23        | IANSLFVQNGFHVNEEFQMMKK            | 1 Mox                  | 1        | 4+        | 685,85        | 25,0        |
| 108-130        | 23        | IANSLFVQNGFHVNEEFQMMKK            | 2 Mox [20, 21]         | 1        | 4+        | 689,84        | 23,0        |
| 130-153        | 24        | KYFNAAVNHVDFSQNVAVANYINK          | -                      | 1        | 4+        | 682,35        | 21,8        |
| 131-152        | 23        | YFNAAVNHVDFSQNVAVANYINK           | -                      | 0        | 3+        | 866,76        | 29,9        |
| <b>154-164</b> | <b>11</b> | <b>WVENNTNNLVK</b>                | <b>1 HexNAc [4]</b>    | <b>0</b> | <b>2+</b> | <b>767,38</b> | <b>12,8</b> |
| 171-187        | 17        | DFDAATYLALINAVYFK                 | -                      | 0        | 2+        | 968,00        | 42,8        |
| 188-200        | 13        | GNWKSQFRPENTR                     | -                      | 1        | 4+        | 405,71        | 8,3         |
| 192-200        | 9         | SQFRPENTR                         | -                      | 0        | 3+        | 378,86        | 3,5         |
| 260-272        | 13        | QEVPLATLEPLVK                     | -                      | 0        | 3+        | 479,62        | 25,2        |
| 260-285        | 26        | QEVPLATLEPLVKAQLVEEWANSVKK        | -                      | 2        | 4+        | 730,66        | 31,7        |
| 273-284        | 12        | AQLVEEWANSVK                      | -                      | 0        | 2+        | 687,36        | 18,1        |
| 273-285        | 13        | AQLVEEWANSVKK                     | -                      | 1        | 3+        | 501,27        | 13,7        |
| 285-294        | 10        | KQKVEVYLPR                        | -                      | 2        | 3+        | 420,59        | 8,5         |
| 286-294        | 9         | QKVEVYLPR                         | -                      | 1        | 3+        | 377,89        | 11,2        |
| 295-304        | 10        | FTVEQEIDLK                        | -                      | 0        | 2+        | 611,32        | 21,0        |
| 295-308        | 14        | FTVEQEIDLKDVLK                    | -                      | 1        | 2+        | 838,96        | 30,0        |
| <b>319-335</b> | <b>17</b> | <b>DANLTGLSDNKEIFLSK</b>          | <b>1 HexNAc(2) [3]</b> | <b>1</b> | <b>3+</b> | <b>757,71</b> | <b>21,2</b> |
| 340-362        | 23        | SFLEVNEEGSEAAVSGMIAISR            | 1 Mox [18]             | 0        | 2+        | 1192,08       | 46,5        |
| 385-393        | 9         | TGTILFMGR                         | -                      | 0        | 2+        | 498,27        | 19,2        |
| 394-410        | 17        | VMHPETMNTSGHDFEEL                 | 2 Mox [2, 7]           | 0        | 3+        | 669,28        | 13,2        |
